# Supplementary material for: Annual changes in biomass amount and feeding potential of shrubby rangelands in maquis formation
Source: PeerJ. 2023 Apr 25;11:e15204. doi: 10.7717/peerj.15204 (PMC10143608; doi:10.7717/peerj.15204)
Supplement: Supplemental Information 1 [file peerj-11-15204-s001.xlsx]

## Sheet: Shrub Yield
Shrub	Term	Year	Replication	Fresh Hay Yield	Dry Hay Yield	Dry Matter Ratio
Phillyrea latifolia	May	1	1	27.1085	9.64992	35.5974
Phillyrea latifolia	May	1	2	27.8522	11.5584	41.4991
Phillyrea latifolia	May	1	3	26.7411	11.648	43.5584
Phillyrea latifolia	May	2	1	52.6221	20.1645	38.3194
Phillyrea latifolia	May	2	2	34.169	11.7152	34.2861
Phillyrea latifolia	May	2	3	33.6986	12.9472	38.6521
Juniperus oxycedrus	May	1	1	12.737	5.2026	40.8463
Juniperus oxycedrus	May	1	2	7.64382	3.31632	43.3857
Juniperus oxycedrus	May	1	3	17.5074	6.10972	34.8979
Juniperus oxycedrus	May	2	1	10.2665	3.96465	38.6175
Juniperus oxycedrus	May	2	2	11.9793	4.8024	40.0891
Juniperus oxycedrus	May	2	3	12.0268	4.67914	39.5673
Paliurus spina-christi	May	1	1	2.46784	0.79552	32.2355
Paliurus spina-christi	May	1	2	2.42323	0.86784	35.8133
Paliurus spina-christi	May	1	3	2.65984	0.79744	29.9808
Paliurus spina-christi	May	2	1	2.73472	0.944512	34.5378
Paliurus spina-christi	May	2	2	2.86912	0.98048	34.1735
Paliurus spina-christi	May	2	3	2.63095	0.877158	33.3482
Spartium junceum	May	1	1	0.624941	0.319546	51.1321
Spartium junceum	May	1	2	0.624941	0.296314	47.4147
Spartium junceum	May	1	3	0.492307	0.267168	54.2686
Spartium junceum	May	2	1	0.494842	0.262522	53.0516
Spartium junceum	May	2	2	1.1333	0.627475	55.3671
Spartium junceum	May	2	3	0.674066	0.354605	52.2468
Anagyris foetida	May	1	1	3.61907	1.24481	34.3957
Anagyris foetida	May	1	2	4.97236	1.44163	28.9928
Anagyris foetida	May	1	3	3.80388	1.31813	34.6522
Anagyris foetida	May	2	1	3.55947	1.19421	33.5502
Anagyris foetida	May	2	2	4.21296	1.5827	37.5674
Anagyris foetida	May	2	3	4.03355	1.35629	33.8317
Quercus coccifera	May	1	1	13.3556	5.15924	38.6298
Quercus coccifera	May	1	2	14.3461	4.34894	30.3145
Quercus coccifera	May	1	3	14.512	5.38342	37.0963
Quercus coccifera	May	2	1	13.9038	5.03852	36.2385
Quercus coccifera	May	2	2	15.2639	6.05861	39.6924
Quercus coccifera	May	2	3	14.2763	5.19775	36.3943
Quercus infectoria	May	1	1	29.6083	12.6829	42.8355
Quercus infectoria	May	1	2	27.0906	12.1498	44.8487
Quercus infectoria	May	1	3	24.3578	12.3469	50.6897
Quercus infectoria	May	2	1	20.4243	10.0173	49.0458
Quercus infectoria	May	2	2	28.7974	12.1587	42.2215
Quercus infectoria	May	2	3	26.0557	11.8711	45.9283
Phillyrea latifolia	November	1	1	12.544	7.20384	57.4286
Phillyrea latifolia	November	1	2	19.712	10.6355	53.9545
Phillyrea latifolia	November	1	3	9.632	5.22816	54.2791
Phillyrea latifolia	November	2	1	12.768	6.46016	50.5965
Phillyrea latifolia	November	2	2	19.264	10.5818	54.9302
Phillyrea latifolia	November	2	3	14.784	8.02189	54.2378
Juniperus oxycedrus	November	1	1	5.6028	3.28164	58.5714
Juniperus oxycedrus	November	1	2	10.4052	4.9358	47.4359
Juniperus oxycedrus	November	1	3	9.2046	4.99983	54.3188
Juniperus oxycedrus	November	2	1	7.337	3.87394	52.8
Juniperus oxycedrus	November	2	2	9.4714	4.42354	46.7042
Juniperus oxycedrus	November	2	3	8.4042	4.30295	51.9661
Paliurus spina-christi	November	1	1	1.02592	0.512	49.9064
Paliurus spina-christi	November	1	2	1.088	0.544	50
Paliurus spina-christi	November	1	3	1.152	0.5568	48.3333
Paliurus spina-christi	November	2	1	1.216	0.576	47.3684
Paliurus spina-christi	November	2	2	1.28	0.5504	43
Paliurus spina-christi	November	2	3	1.15238	0.54784	47.7216
Spartium junceum	November	1	1	0.391354	0.159034	40.6368
Spartium junceum	November	1	2	0.415008	0.185222	44.631
Spartium junceum	November	1	3	0.376781	0.178042	47.2534
Spartium junceum	November	2	1	0.405715	0.201062	49.5575
Spartium junceum	November	2	2	0.425146	0.199162	46.8455
Spartium junceum	November	2	3	0.402801	0.184504	45.7848
Anagyris foetida	November	1	1	0.68608	0.303162	44.1875
Anagyris foetida	November	1	2	0.72896	0.295014	40.4706
Anagyris foetida	November	1	3	0.83616	0.327603	39.1795
Anagyris foetida	November	2	1	0.83616	0.348186	41.641
Anagyris foetida	November	2	2	0.842592	0.365766	43.4097
Anagyris foetida	November	2	3	0.78599	0.327946	41.7777
Quercus coccifera	November	1	1	6.0864	3.0432	50
Quercus coccifera	November	1	2	6.49216	2.84032	43.75
Quercus coccifera	November	1	3	6.89792	3.24608	47.0588
Quercus coccifera	November	2	1	6.69504	3.44896	51.5152
Quercus coccifera	November	2	2	7.1008	3.34752	47.1429
Quercus coccifera	November	2	3	6.65446	3.18522	47.8934
Quercus infectoria	November	1	1	8.512	4.8384	56.8421
Quercus infectoria	November	1	2	11.2	6.48704	57.92
Quercus infectoria	November	1	3	6.72	3.6512	54.3333
Quercus infectoria	November	2	1	36.288	18.4038	50.716
Quercus infectoria	November	2	2	12.992	7.4816	57.5862
Quercus infectoria	November	2	3	15.1424	8.17242	55.4795

## Sheet: Chemical Analysis of Shrub
Shrub	Shrub	Term	Term	Year	Replication	Crude Protein	Crude Ash	Crude Fat	Crude Fiber	NDF	ADF	ADL
Phillyrea latifolia	1	Mar.	3	1	1	12.05	5.53	8.02	18.07	37.52	36	11.23
Phillyrea latifolia	1	Mar.	3	1	2	11.6	4.75	8.78	16.65	39.62	36.2	12.58
Phillyrea latifolia	1	Mar	3	1	3	10.36	5.12	8.52	17.23	38.12	36.1	11.65
Phillyrea latifolia	1	Apr.	4	1	1	13.12	5.56	7.24	18.92	40.13	35.21	12.23
Phillyrea latifolia	1	Apr.	4	1	2	13.41	6.19	7.36	17.96	39.95	36.21	12.36
Phillyrea latifolia	1	Apr.	4	1	3	13.25	5.98	7.35	18.12	39.52	35.26	12.24
Phillyrea latifolia	1	May	5	1	1	14.2	5.63	6.94	23.2	43.56	35.26	12.65
Phillyrea latifolia	1	May	5	1	2	12.36	5.62	7.12	22.35	42.65	36.25	12.54
Phillyrea latifolia	1	May	5	1	3	13.63	5.62	7.12	21.23	43.5	35.26	12.63
Phillyrea latifolia	1	June	6	1	1	12.3	5.69	6.85	24.1	44.28	34.2	13.58
Phillyrea latifolia	1	June	6	1	2	12.25	5.68	6.95	23.2	45.62	35.21	13.54
Phillyrea latifolia	1	June	6	1	3	12.36	5.25	6.92	23.45	45.1	34.52	13.56
Phillyrea latifolia	1	July	7	1	1	9.13	5.82	6.65	23.3	45.62	33.2	13.59
Phillyrea latifolia	1	July	7	1	2	10.13	5.75	6.75	23.69	46.23	34.3	13.95
Phillyrea latifolia	1	July	7	1	3	11.32	5.79	6.7	23.41	46.25	33.62	13.25
Phillyrea latifolia	1	Aug.	8	1	1	9.65	4.68	6.52	23.25	45.22	33.26	13.85
Phillyrea latifolia	1	Aug.	8	1	2	9.85	5.1	6.63	22.58	46.21	34.1	13.87
Phillyrea latifolia	1	Aug.	8	1	3	9.78	7.96	6.58	22.96	46.35	34.52	13.24
Phillyrea latifolia	1	Sep.	9	1	1	8.52	4.23	6.35	19.25	46.52	33.86	14.58
Phillyrea latifolia	1	Sep.	9	1	2	8.96	4.98	6.24	21.2	46.32	34.25	14.36
Phillyrea latifolia	1	Sep.	9	1	3	8.62	4.65	6.29	20.32	46.52	33.26	14.32
Phillyrea latifolia	1	Oct.	10	1	1	7.69	5.86	7.45	18.65	46.25	34.25	15.52
Phillyrea latifolia	1	Oct.	10	1	2	8.66	4.86	6.86	19.62	45.58	35.28	14.89
Phillyrea latifolia	1	Oct.	10	1	3	8.23	5.32	7.12	18.69	46.1	34.26	14.56
Phillyrea latifolia	1	Nov.	11	1	1	8.05	6.92	8.28	18.25	47.25	34.26	15.64
Phillyrea latifolia	1	Nov.	11	1	2	8.96	4.75	7.65	18.54	47.95	35.69	15.42
Phillyrea latifolia	1	Nov.	11	1	3	8.14	5.24	8.1	18.41	47.2	34.52	15.36
Phillyrea latifolia	1	Dec.	12	1	1	8.76	4.15	8.35	17.3	45.36	36.28	16.84
Phillyrea latifolia	1	Dec.	12	1	2	9.12	4.65	8.12	17.36	48.52	37.58	16.29
Phillyrea latifolia	1	Dec.	12	1	3	9.02	4.36	8.21	17.23	47.52	36.21	16.24
Phillyrea latifolia	1	Jan.	1	1	1	8.86	4.25	8.45	17.56	43.2	38.52	16.1
Phillyrea latifolia	1	Jan.	1	1	2	9.52	4.35	8.62	17.65	45.2	39.54	16.2
Phillyrea latifolia	1	Jan.	1	1	3	9.21	4.38	8.5	17.58	44.36	38.54	16.21
Phillyrea latifolia	1	Feb.	2	1	1	9.65	4.36	7.62	17.62	41.35	38.21	14.32
Phillyrea latifolia	1	Feb.	2	1	2	9.68	4.26	8.69	16.52	43.2	39.74	14.6
Phillyrea latifolia	1	Feb.	2	1	3	9.65	4.3	7.86	16.95	42.35	38.52	14.23
Phillyrea latifolia	1	Mar.	3	2	1	11.6	4.75	8.78	16.65	39.62	36.2	12.58
Phillyrea latifolia	1	Mar.	3	1	2	12.05	5.53	8.02	18.07	37.52	36	11.23
Phillyrea latifolia	1	Mar.	3	1	3	11.68	5.12	8.52	17.23	38.52	36.25	11.36
Phillyrea latifolia	1	Apr.	4	2	1	13.41	6.19	7.36	17.96	39.95	36.21	12.36
Phillyrea latifolia	1	Apr.	4	2	2	13.12	5.56	7.24	18.92	40.13	35.21	12.23
Phillyrea latifolia	1	Apr.	4	2	3	13.25	5.19	7.3	18.14	40.21	35.21	12.52
Phillyrea latifolia	1	May	5	2	1	12.36	5.62	7.12	22.35	42.65	36.25	12.54
Phillyrea latifolia	1	May	5	2	2	14.2	5.63	6.94	23.2	43.56	35.26	12.65
Phillyrea latifolia	1	May	5	2	3	13.62	5.62	7.01	22.96	43.25	36.21	12.2
Phillyrea latifolia	1	June	6	2	1	12.25	5.68	6.95	23.2	45.62	35.21	13.54
Phillyrea latifolia	1	June	6	2	2	12.3	5.69	6.85	24.1	44.28	34.2	13.58
Phillyrea latifolia	1	June	6	2	3	12.28	5.67	6.8	23.85	45.25	34.25	13.24
Phillyrea latifolia	1	July	7	2	1	10.13	5.75	6.75	23.69	46.23	34.3	13.95
Phillyrea latifolia	1	July	7	2	2	9.13	5.82	6.65	23.3	45.62	33.2	13.59
Phillyrea latifolia	1	July	7	2	3	9.65	5.8	6.7	23.1	46.25	33.25	13.24
Phillyrea latifolia	1	Aug.	8	2	1	9.85	5.1	6.63	22.58	46.21	34.1	13.87
Phillyrea latifolia	1	Aug.	8	2	2	9.65	4.68	6.52	23.25	45.22	33.26	13.85
Phillyrea latifolia	1	Aug.	8	2	3	9.75	4.86	6.55	22.58	46.32	33.69	13.24
Phillyrea latifolia	1	Sep.	9	2	1	8.96	4.98	6.24	21.2	46.32	34.25	14.36
Phillyrea latifolia	1	Sep.	9	2	2	8.52	4.23	6.35	19.25	46.52	33.86	14.58
Phillyrea latifolia	1	Sep.	9	2	3	8.68	4.65	6.3	20.31	46.2	33.24	14.36
Phillyrea latifolia	1	Oct.	10	2	1	8.66	4.86	6.86	19.62	45.58	35.28	14.89
Phillyrea latifolia	1	Oct.	10	2	2	7.69	5.86	7.45	18.65	46.25	34.25	15.52
Phillyrea latifolia	1	Oct.	10	2	3	8.32	5.34	7.21	18.95	46.21	34.52	14.58
Phillyrea latifolia	1	Nov.	11	2	1	8.96	4.75	7.65	18.54	47.95	35.69	15.42
Phillyrea latifolia	1	Nov.	11	2	2	8.05	6.92	8.28	18.25	47.25	34.26	15.64
Phillyrea latifolia	1	Nov.	11	2	3	8.45	5.21	7.96	18.25	47.32	34.26	15.32
Phillyrea latifolia	1	Dec.	12	2	1	9.12	4.65	8.12	17.36	48.52	37.58	16.29
Phillyrea latifolia	1	Dec.	12	2	2	8.76	4.15	8.35	17.3	45.36	36.28	16.84
Phillyrea latifolia	1	Dec.	12	2	3	8.95	4.41	8.2	17.45	46.2	36.58	16.24
Phillyrea latifolia	1	Jan.	1	2	1	9.52	4.35	8.62	17.65	45.2	39.54	16.2
Phillyrea latifolia	1	Jan.	1	2	2	8.86	4.25	8.45	17.56	43.2	38.52	16.1
Phillyrea latifolia	1	Jan.	1	2	3	9.1	4.21	8.5	17.59	44.32	38.65	16.21
Phillyrea latifolia	1	Feb.	2	2	1	9.68	4.26	8.69	16.52	43.2	39.74	14.6
Phillyrea latifolia	1	Feb.	2	2	2	9.65	4.36	7.62	17.62	41.35	38.21	14.32
Phillyrea latifolia	1	Feb.	2	2	3	9.56	4.79	8.1	16.95	42.36	38.52	14.25
Phillyrea latifolia	2	Mar.	3	1	1	5.23	5.51	10.32	18.55	40.23	35.2	12.36
Phillyrea latifolia	2	Mar.	3	1	2	5.35	5.65	10.25	20.33	40.28	36.8	13.56
Juniperus oxycedrus	2	Mar	3	1	3	5.31	5.59	10.28	19.25	40.25	35.69	12.35
Juniperus oxycedrus	2	Apr.	4	1	1	5.69	5.12	9.29	21.39	43.52	36.25	13.58
Juniperus oxycedrus	2	Apr.	4	1	2	5.71	5.42	9.65	21.25	44.53	37.85	14.58
Juniperus oxycedrus	2	Apr.	4	1	3	5.7	5.32	9.52	20.32	44.25	36	13.25
Juniperus oxycedrus	2	May	5	1	1	6.74	5.1	9.12	25.65	45.38	37.54	14.58
Juniperus oxycedrus	2	May	5	1	2	6.25	5.36	9.45	24.52	46.3	38.52	15.32
Juniperus oxycedrus	2	May	5	1	3	6.45	5.21	9.3	25.25	46.25	37.85	14.25
Juniperus oxycedrus	2	June	6	1	1	7.42	4.95	9.02	26.58	46.82	38.12	16.58
Juniperus oxycedrus	2	June	6	1	2	7.24	5.1	9.15	25.38	47.32	39.2	17.2
Juniperus oxycedrus	2	June	6	1	3	7.36	5.01	9.1	25.69	47.65	38.56	16.32
Juniperus oxycedrus	2	July	7	1	1	8.12	4.82	8.96	28.27	47.52	40.23	18.54
Juniperus oxycedrus	2	July	7	1	2	7.89	4.96	8.96	27.48	48.63	41.2	19.63
Juniperus oxycedrus	2	July	7	1	3	7.95	4.89	8.75	26.54	48.54	40.21	17.2
Juniperus oxycedrus	2	Aug.	8	1	1	8.23	4.58	9.23	30.26	49.5	40.58	19.68
Juniperus oxycedrus	2	Aug.	8	1	2	8.65	4.72	8.87	29.3	50.31	41.25	20.21
Juniperus oxycedrus	2	Aug.	8	1	3	8.41	4.63	9.1	30.25	50.15	40.26	19.65
Juniperus oxycedrus	2	Sep.	9	1	1	8.36	4.76	8.72	30.25	48.62	39.51	20.52
Juniperus oxycedrus	2	Sep.	9	1	2	8.72	4.35	8.65	29.51	49.25	40.36	21.3
Juniperus oxycedrus	2	Sep.	9	1	3	8.65	4.41	8.67	31.23	49.63	39.65	20.32
Juniperus oxycedrus	2	Oct.	10	1	1	8.71	5.23	8.12	29.58	48.2	38.74	20.51
Juniperus oxycedrus	2	Oct.	10	1	2	8.65	4.69	7.54	28.3	48.36	39.58	21.4
Juniperus oxycedrus	2	Oct.	10	1	3	8.69	4.85	7.85	29.56	48.36	38.54	20.54
Juniperus oxycedrus	2	Nov.	11	1	1	7.56	5.54	7.36	29.74	46.57	38.2	19.85
Juniperus oxycedrus	2	Nov.	11	1	2	7.69	5.1	7.26	28.1	47.3	39.74	20.36
Juniperus oxycedrus	2	Nov.	11	1	3	7.61	5.32	7.3	29.54	47.2	38.69	19.62
Juniperus oxycedrus	2	Dec.	12	1	1	7.41	5.86	7.45	26.42	45.1	37.65	17.23
Juniperus oxycedrus	2	Dec.	12	1	2	7.35	5.76	7.36	26.3	46.39	38.32	18.25
Juniperus oxycedrus	2	Dec.	12	1	3	7.39	5.79	7.39	27.36	46.21	38.52	17.32
Juniperus oxycedrus	2	Jan.	1	1	1	6.23	6.1	8.65	24.15	43.13	37.62	16.25
Juniperus oxycedrus	2	Jan.	1	1	2	6.87	5.96	8.69	25.1	44.85	38.54	17.36
Juniperus oxycedrus	2	Jan.	1	1	3	6.58	6.01	8.68	25.36	44.21	37.65	16.52
Juniperus oxycedrus	2	Feb.	2	1	1	5.21	6.2	9.65	22.69	41.98	36.87	14.36
Juniperus oxycedrus	2	Feb.	2	1	2	5.1	6.1	9.98	23.21	42.56	37.21	15.41
Juniperus oxycedrus	2	Feb.	2	1	3	5.15	6.15	9.75	23.54	42.58	36.52	14.36
Juniperus oxycedrus	2	Mar.	3	2	1	5.35	5.65	10.25	20.33	40.28	36.8	13.56
Juniperus oxycedrus	2	Mar.	3	1	2	5.23	5.51	10.32	18.55	40.23	35.2	12.36
Juniperus oxycedrus	2	Mar	3	1	3	5.29	5.58	10.29	19.58	40.18	35.62	12.35
Juniperus oxycedrus	2	Apr.	4	2	1	5.71	5.42	9.65	21.25	44.53	37.85	14.58
Juniperus oxycedrus	2	Apr.	4	2	2	5.69	5.12	9.29	21.39	43.52	36.25	13.58
Juniperus oxycedrus	2	Apr.	4	2	3	5.7	5.32	9.4	21.58	44.85	36.58	13.65
Juniperus oxycedrus	2	May	5	2	1	6.25	5.36	9.45	24.52	46.3	38.52	15.32
Juniperus oxycedrus	2	May	5	2	2	6.74	5.1	9.12	25.65	45.38	37.54	14.58
Juniperus oxycedrus	2	May	5	2	3	6.65	5.2	9.3	25.1	46.85	37.85	14.59
Juniperus oxycedrus	2	June	6	2	1	7.24	5.1	9.15	25.38	47.32	39.2	17.2
Juniperus oxycedrus	2	June	6	2	2	7.42	4.95	9.02	26.58	46.82	38.12	16.58
Juniperus oxycedrus	2	June	6	2	3	7.35	5.02	9.13	26.35	47.68	38.54	16.5
Juniperus oxycedrus	2	July	7	2	1	7.89	4.96	8.96	27.48	48.63	41.2	19.63
Juniperus oxycedrus	2	July	7	2	2	8.12	4.82	8.96	28.27	47.52	40.23	18.54
Juniperus oxycedrus	2	July	7	2	3	7.95	4.85	8.56	28.63	48.54	40.21	18.6
Juniperus oxycedrus	2	Aug.	8	2	1	8.65	4.72	8.87	29.3	50.31	41.25	20.21
Juniperus oxycedrus	2	Aug.	8	2	2	8.23	4.58	9.23	30.26	49.5	40.58	19.68
Juniperus oxycedrus	2	Aug.	8	2	3	8.54	4.65	9.1	29.69	50.14	40.23	19.85
Juniperus oxycedrus	2	Sep.	9	2	1	8.72	4.35	8.65	29.51	49.25	40.36	21.3
Juniperus oxycedrus	2	Sep.	9	2	2	8.36	4.76	8.72	30.25	48.62	39.51	20.52
Juniperus oxycedrus	2	Sep.	9	2	3	8.65	4.5	8.68	30.25	49.56	39.52	20.25
Juniperus oxycedrus	2	Oct.	10	2	1	8.65	4.69	7.54	28.3	48.36	39.58	21.4
Juniperus oxycedrus	2	Oct.	10	2	2	8.71	5.23	8.12	29.58	48.2	38.74	20.51
Juniperus oxycedrus	2	Oct.	10	2	3	8.69	4.41	7.95	29.52	48.51	38.65	20.59
Juniperus oxycedrus	2	Nov.	11	2	1	7.69	5.1	7.26	28.1	47.3	39.74	20.36
Juniperus oxycedrus	2	Nov.	11	2	2	7.56	5.54	7.36	29.74	46.57	38.2	19.85
Juniperus oxycedrus	2	Nov.	11	2	3	7.59	5.35	7.3	30.14	47.54	38.54	19.65
Juniperus oxycedrus	2	Dec.	12	2	1	7.35	5.76	7.36	26.3	46.39	38.32	18.25
Juniperus oxycedrus	2	Dec.	12	2	2	7.41	5.86	7.45	26.42	45.1	37.65	17.23
Juniperus oxycedrus	2	Dec.	12	2	3	7.39	5.8	7.39	27.25	46.59	37.56	17.65
Juniperus oxycedrus	2	Jan.	1	2	1	6.87	5.96	8.69	25.1	44.85	38.54	17.36
Juniperus oxycedrus	2	Jan.	1	2	2	6.23	6.1	8.65	24.15	43.13	37.62	16.25
Juniperus oxycedrus	2	Jan.	1	2	3	9.52	6.01	8.59	25.14	44.1	37.54	16.54
Juniperus oxycedrus	2	Feb.	2	2	1	5.1	6.1	9.98	23.21	42.56	37.21	15.41
Juniperus oxycedrus	2	Feb.	2	2	2	5.21	6.2	9.65	22.69	41.98	36.87	14.36
Juniperus oxycedrus	2	Feb.	2	2	3	5.15	6.15	9.78	23.24	42.14	36.58	14.59
Paliurus spina-christi	3	Mar.	3	1	1	17.3	7.25	6.52	15.23	34.5	25.69	11.3
Paliurus spina-christi	3	Mar.	3	1	2	17.3	7.98	6.25	16.52	36.59	29.58	12.5
Paliurus spina-christi	3	Mar	3	1	3	17.36	7.54	6.35	15.32	35.12	26.32	11.36
Paliurus spina-christi	3	Apr.	4	1	1	17.25	7.36	6.32	15.69	34.36	26.58	12
Paliurus spina-christi	3	Apr.	4	1	2	17.32	7.42	6.35	16.1	37.56	28.6	13.2
Paliurus spina-christi	3	Apr.	4	1	3	17.29	7.39	6.31	16.25	36.52	27.52	12.25
Paliurus spina-christi	3	May	5	1	1	16.2	8.2	6.1	16.58	35.26	27.85	12.15
Paliurus spina-christi	3	May	5	1	2	16.2	8.13	5.36	17.58	38.5	30.25	13.65
Paliurus spina-christi	3	May	5	1	3	16.23	8.16	5.89	16.52	36.52	28.52	12.26
Paliurus spina-christi	3	June	6	1	1	15.21	9.52	5.2	18.62	36.58	29.58	13.25
Paliurus spina-christi	3	June	6	1	2	13.25	9.35	5.45	19.52	39.6	31.25	14.25
Paliurus spina-christi	3	June	6	1	3	14.23	9.41	5.3	18.36	37.56	30.21	13.3
Paliurus spina-christi	3	July	7	1	1	14.1	10.2	5.85	19.25	37.52	32.65	14.36
Paliurus spina-christi	3	July	7	1	2	13.64	9.98	4.56	20.47	40.29	34.68	15.24
Paliurus spina-christi	3	July	7	1	3	13.68	10.1	4.96	19.2	38.69	33.25	14.59
Paliurus spina-christi	3	Aug.	8	1	1	14.32	11.21	4.1	23.62	38.41	33.56	15.41
Paliurus spina-christi	3	Aug.	8	1	2	12.84	10.25	4.65	24.96	40.37	35.47	16.52
Paliurus spina-christi	3	Aug.	8	1	3	13.12	10.35	4.4	24.25	39.65	34.56	15.6
Paliurus spina-christi	3	Sep.	9	1	1	13.58	10.25	4.35	25.63	39.5	35.24	16.5
Paliurus spina-christi	3	Sep.	9	1	2	10.74	9.25	4.2	26.75	41.5	37.62	16.58
Paliurus spina-christi	3	Sep.	9	1	3	12.36	9.52	4.25	25.2	40.25	36.52	16.2
Paliurus spina-christi	3	Oct.	10	1	1	12.56	9.32	4.1	22.1	39.62	35.21	16.23
Paliurus spina-christi	3	Oct.	10	1	2	9.95	8.36	5.1	23.1	41.23	37.45	16.32
Paliurus spina-christi	3	Oct.	10	1	3	11.25	8.56	4.25	23.15	40.25	36.59	16.24
Paliurus spina-christi	3	Nov.	11	1	1	0	0	0	0	0	0	0
Paliurus spina-christi	3	Nov.	11	1	2	0	0	0	0	0	0	0
Paliurus spina-christi	3	Nov.	11	1	3	0	0	0	0	0	0	0
Paliurus spina-christi	3	Dec.	12	1	1	0	0	0	0	0	0	0
Paliurus spina-christi	3	Dec.	12	1	2	0	0	0	0	0	0	0
Paliurus spina-christi	3	Dec.	12	1	3	0	0	0	0	0	0	0
Paliurus spina-christi	3	Jan.	1	1	1	0	0	0	0	0	0	0
Paliurus spina-christi	3	Jan.	1	1	2	0	0	0	0	0	0	0
Paliurus spina-christi	3	Jan.	1	1	3	0	0	0	0	0	0	0
Paliurus spina-christi	3	Feb.	2	1	1	0	0	0	0	0	0	0
Paliurus spina-christi	3	Feb.	2	1	2	0	0	0	0	0	0	0
Paliurus spina-christi	3	Feb.	2	1	3	0	0	0	0	0	0	0
Paliurus spina-christi	3	Mar.	3	2	1	16.86	7.98	6.14	16.52	36.59	29.58	12.5
Paliurus spina-christi	3	Mar.	3	1	2	17.3	6.93	6.52	15.23	34.5	25.69	11.3
Paliurus spina-christi	3	Mar	3	1	3	17.12	7.41	6.32	16.24	35.65	27.45	11.65
Paliurus spina-christi	3	Apr.	4	2	1	17.3	7.42	6.25	16.1	37.56	28.6	13.2
Paliurus spina-christi	3	Apr.	4	2	2	17.25	7.36	6.32	15.69	34.36	26.58	12
Paliurus spina-christi	3	Apr.	4	2	3	17.36	7.39	6.31	16.58	36.52	27.56	12.4
Paliurus spina-christi	3	May	5	2	1	17.32	8.13	6.35	17.58	38.5	30.25	13.65
Paliurus spina-christi	3	May	5	2	2	16.2	8.2	6.1	16.58	35.26	27.85	12.15
Paliurus spina-christi	3	May	5	2	3	16.54	8.15	6.2	17.2	37.41	29.56	12.65
Paliurus spina-christi	3	June	6	2	1	16.2	9.35	5.36	19.52	39.6	31.25	14.25
Paliurus spina-christi	3	June	6	2	2	15.21	9.52	5.2	18.62	36.58	29.58	13.25
Paliurus spina-christi	3	June	6	2	3	15.58	9.45	5.25	19.52	37.48	30.26	13.58
Paliurus spina-christi	3	July	7	2	1	13.25	9.98	5.45	20.47	40.29	34.68	15.24
Paliurus spina-christi	3	July	7	2	2	14.1	10.2	5.85	19.25	37.52	32.65	14.36
Paliurus spina-christi	3	July	7	2	3	13.69	10.1	5.65	20.35	38.96	33.65	14.59
Paliurus spina-christi	3	Aug.	8	2	1	13.64	10.25	4.56	24.96	40.37	35.47	16.52
Paliurus spina-christi	3	Aug.	8	2	2	14.32	11.21	4.1	23.62	38.41	33.56	15.41
Paliurus spina-christi	3	Aug.	8	2	3	13.95	10.23	4.35	24.25	39.52	34.52	15.6
Paliurus spina-christi	3	Sep.	9	2	1	12.84	9.25	4.65	26.75	41.5	37.62	16.58
Paliurus spina-christi	3	Sep.	9	2	2	13.58	10.25	4.35	25.63	39.5	35.24	16.5
Paliurus spina-christi	3	Sep.	9	2	3	13.25	9.56	4.41	26.32	40.25	36.53	16.53
Paliurus spina-christi	3	Oct.	10	2	1	10.74	8.36	4.2	23.1	41.23	37.45	16.32
Paliurus spina-christi	3	Oct.	10	2	2	12.56	9.32	4.1	22.1	39.62	35.21	16.23
Paliurus spina-christi	3	Oct.	10	2	3	11.25	8.85	4.15	23.2	40.35	36.51	16.3
Paliurus spina-christi	3	Nov.	11	2	1	0	0	0	0	0	0	0
Paliurus spina-christi	3	Nov.	11	2	2	0	0	0	0	0	0	0
Paliurus spina-christi	3	Nov.	11	2	3	0	0	0	0	0	0	0
Paliurus spina-christi	3	Dec.	12	2	1	0	0	0	0	0	0	0
Paliurus spina-christi	3	Dec.	12	2	2	0	0	0	0	0	0	0
Paliurus spina-christi	3	Dec.	12	2	3	0	0	0	0	0	0	0
Paliurus spina-christi	3	Jan.	1	2	1	0	0	0	0	0	0	0
Paliurus spina-christi	3	Jan.	1	2	2	0	0	0	0	0	0	0
Paliurus spina-christi	3	Jan.	1	2	3	0	0	0	0	0	0	0
Paliurus spina-christi	3	Feb.	2	2	1	0	0	0	0	0	0	0
Paliurus spina-christi	3	Feb.	2	2	2	0	0	0	0	0	0	0
Paliurus spina-christi	3	Feb.	2	2	3	0	0	0	0	0	0	0
Spartium junceum	4	Mar.	3	1	1	15.3	4.5	6.32	12.3	39	25.91	11.25
Spartium junceum	4	Mar.	3	1	2	15.36	5.1	5.68	13.54	40.32	26.52	11.35
Spartium junceum	4	Mar	3	1	3	15.32	4.69	6.1	12.6	39.68	25.36	11.23
Spartium junceum	4	Apr.	4	1	1	15.03	5.36	5.96	13.1	41.2	30	12.36
Spartium junceum	4	Apr.	4	1	2	15.38	5.26	6.29	12.3	41.3	29.65	11.36
Spartium junceum	4	Apr.	4	1	3	15.24	5.28	6.12	12.6	41.36	29.65	11.56
Spartium junceum	4	May	5	1	1	14.06	5.69	5.69	13.42	42.25	32	13.54
Spartium junceum	4	May	5	1	2	13.2	5.54	5.68	13.1	41.58	31.57	12.84
Spartium junceum	4	May	5	1	3	13.56	5.61	5.55	13.25	41.59	31.56	12.65
Spartium junceum	4	June	6	1	1	14.15	6.58	5.1	15.1	44.36	34.52	14.78
Spartium junceum	4	June	6	1	2	12.26	5.96	5.1	14.2	43.62	33.87	13.98
Spartium junceum	4	June	6	1	3	13.1	6.25	5.14	14.56	43.69	33.58	13.58
Spartium junceum	4	July	7	1	1	13.2	7.58	4.59	16.52	44.35	35.62	15.89
Spartium junceum	4	July	7	1	2	12.58	6.87	4.95	16.47	44.28	34.74	14.57
Spartium junceum	4	July	7	1	3	12.59	7.23	5.1	16.32	44.25	34.58	14.58
Spartium junceum	4	Aug.	8	1	1	11.36	8.23	4.36	19.24	45.1	36.52	16.54
Spartium junceum	4	Aug.	8	1	2	11.85	7.38	4.58	18.2	45.28	35.28	15.47
Spartium junceum	4	Aug.	8	1	3	11.45	7.95	4.42	17.12	45.21	35.69	15.62
Spartium junceum	4	Sep.	9	1	1	10.58	6.58	4.12	22.1	44.1	35.24	15.84
Spartium junceum	4	Sep.	9	1	2	9.65	6.3	4.15	21.2	45.1	35.84	14.89
Spartium junceum	4	Sep.	9	1	3	10.2	6.41	4.13	21.36	44.68	35.62	14.5
Spartium junceum	4	Oct.	10	1	1	9.53	5.38	4.35	22.68	44.23	35.69	15.32
Spartium junceum	4	Oct.	10	1	2	9.63	5.47	4.02	22.47	45.36	35.6	15.41
Spartium junceum	4	Oct.	10	1	3	9.58	5.4	4.2	22.5	44.59	35.58	15.41
Spartium junceum	4	Nov.	11	1	1	0	0	0	0	0	0	0
Spartium junceum	4	Nov.	11	1	2	0	0	0	0	0	0	0
Spartium junceum	4	Nov.	11	1	3	0	0	0	0	0	0	0
Spartium junceum	4	Dec.	12	1	1	0	0	0	0	0	0	0
Spartium junceum	4	Dec.	12	1	2	0	0	0	0	0	0	0
Spartium junceum	4	Dec.	12	1	3	0	0	0	0	0	0	0
Spartium junceum	4	Jan.	1	1	1	0	0	0	0	0	0	0
Spartium junceum	4	Jan.	1	1	2	0	0	0	0	0	0	0
Spartium junceum	4	Jan.	1	1	3	0	0	0	0	0	0	0
Spartium junceum	4	Feb.	2	1	1	0	0	0	0	0	0	0
Spartium junceum	4	Feb.	2	1	2	0	0	0	0	0	0	0
Spartium junceum	4	Feb.	2	1	3	0	0	0	0	0	0	0
Spartium junceum	4	Mar.	3	2	1	15.36	5.1	5.68	13.54	40.32	26.52	11.35
Spartium junceum	4	Mar.	3	1	2	15.3	4.5	6.32	12.3	39	25.91	11.25
Spartium junceum	4	Mar	3	1	3	15.31	4.95	5.89	12.69	39.52	25.69	11.59
Spartium junceum	4	Apr.	4	2	1	15.38	5.26	6.29	12.3	41.3	29.65	11.36
Spartium junceum	4	Apr.	4	2	2	15.03	5.36	5.96	13.1	41.2	30	12.36
Spartium junceum	4	Apr.	4	2	3	15.26	5.31	6.1	12.58	41.2	29.54	12.65
Spartium junceum	4	May	5	2	1	13.2	5.54	5.68	13.1	41.58	31.57	12.84
Spartium junceum	4	May	5	2	2	14.06	5.69	5.69	13.42	42.25	32	13.54
Spartium junceum	4	May	5	2	3	13.54	5.6	5.7	13.35	41.32	31.65	12.54
Spartium junceum	4	June	6	2	1	12.26	5.96	5.1	14.2	43.62	33.87	13.98
Spartium junceum	4	June	6	2	2	14.15	6.58	5.1	15.1	44.36	34.52	14.78
Spartium junceum	4	June	6	2	3	13.1	6.32	5.12	14.69	44.27	33.69	13.54
Spartium junceum	4	July	7	2	1	12.58	6.87	4.95	16.47	44.28	34.74	14.57
Spartium junceum	4	July	7	2	2	13.2	7.58	4.59	16.52	44.35	35.62	15.89
Spartium junceum	4	July	7	2	3	13.01	7.32	4.68	16.52	44.32	34.57	14.52
Spartium junceum	4	Aug.	8	2	1	11.85	7.38	4.58	18.2	45.28	35.28	15.47
Spartium junceum	4	Aug.	8	2	2	11.36	8.23	4.36	19.24	45.1	36.52	16.54
Spartium junceum	4	Aug.	8	2	3	11.65	7.59	4.41	18.65	45.2	35.26	15.62
Spartium junceum	4	Sep.	9	2	1	9.65	6.3	4.15	21.2	45.1	35.84	14.89
Spartium junceum	4	Sep.	9	2	2	10.58	6.58	4.12	22.1	44.1	35.24	15.84
Spartium junceum	4	Sep.	9	2	3	9.95	6.4	4.1	21.65	44.58	35.1	15.47
Spartium junceum	4	Oct.	10	2	1	9.63	5.47	4.02	22.47	45.36	35.6	15.41
Spartium junceum	4	Oct.	10	2	2	9.53	5.38	4.35	22.68	44.23	35.69	15.32
Spartium junceum	4	Oct.	10	2	3	9.98	5.41	4.2	22.5	44.36	35.69	15.32
Spartium junceum	4	Nov.	11	2	1	0	0	0	0	0	0	0
Spartium junceum	4	Nov.	11	2	2	0	0	0	0	0	0	0
Spartium junceum	4	Nov.	11	2	3	0	0	0	0	0	0	0
Spartium junceum	4	Dec.	12	2	1	0	0	0	0	0	0	0
Spartium junceum	4	Dec.	12	2	2	0	0	0	0	0	0	0
Spartium junceum	4	Dec.	12	2	3	0	0	0	0	0	0	0
Spartium junceum	4	Jan.	1	2	1	0	0	0	0	0	0	0
Spartium junceum	4	Jan.	1	2	2	0	0	0	0	0	0	0
Spartium junceum	4	Jan.	1	2	3	0	0	0	0	0	0	0
Spartium junceum	4	Feb.	2	2	1	0	0	0	0	0	0	0
Spartium junceum	4	Feb.	2	2	2	0	0	0	0	0	0	0
Spartium junceum	4	Feb.	2	2	3	0	0	0	0	0	0	0
Anagyris foetida	5	Mar.	3	1	1	18.2	6.58	5.12	14.16	38.72	25.25	6.22
Anagyris foetida	5	Mar.	3	1	2	16.85	10.78	5.26	13.09	37.25	28.61	6.65
Anagyris foetida	5	Mar	3	1	3	17.25	8.25	5.32	13.25	37.85	26.35	6.25
Anagyris foetida	5	Apr.	4	1	1	19.36	10.23	4.83	14.35	38.63	28.63	6.99
Anagyris foetida	5	Apr.	4	1	2	19.52	12.94	4.96	13.7	38.65	31.26	6.68
Anagyris foetida	5	Apr.	4	1	3	19.25	11.32	5.1	14.1	38.52	27.52	6.58
Anagyris foetida	5	May	5	1	1	20.14	11.2	4.25	14.25	40.25	28.32	7.92
Anagyris foetida	5	May	5	1	2	21.21	11.36	4.65	14.68	39.52	33.58	7.68
Anagyris foetida	5	May	5	1	3	20.13	11.26	4.4	14.3	39.65	29.65	7.56
Anagyris foetida	5	June	6	1	1	16.52	11.36	4.36	15.35	42.65	29.35	8.36
Anagyris foetida	5	June	6	1	2	18.63	12.34	4.35	16.52	41.23	34.58	8.95
Anagyris foetida	5	June	6	1	3	17.25	11.35	4.3	15.69	41.59	30.25	8.65
Anagyris foetida	5	July	7	1	1	14.12	12.3	4.1	16.23	43.69	31.24	8.1
Anagyris foetida	5	July	7	1	2	16.23	11.34	4.25	17.35	42.57	35.1	9.15
Anagyris foetida	5	July	7	1	3	15.23	11.36	4.16	16.54	42.57	32.25	8.12
Anagyris foetida	5	Aug.	8	1	1	14.2	12.14	3.9	17.54	44.2	33.2	8.36
Anagyris foetida	5	Aug.	8	1	2	15.3	12.54	4.14	18.54	43.2	35.12	10.24
Anagyris foetida	5	Aug.	8	1	3	14.59	12.35	5.12	17.6	43.26	34.25	9.65
Anagyris foetida	5	Sep.	9	1	1	13.2	11.3	4.13	19.36	44.32	34.52	8.45
Anagyris foetida	5	Sep.	9	1	2	12.58	12.38	3.92	20.39	43.57	34.27	9.63
Anagyris foetida	5	Sep.	9	1	3	12.69	12.35	4.68	19.42	43.52	34.56	8.69
Anagyris foetida	5	Oct.	10	1	1	13.14	10.25	4.09	22.36	44.32	34.2	9.62
Anagyris foetida	5	Oct.	10	1	2	12.1	11.35	4.14	22.41	43.21	34.56	10.23
Anagyris foetida	5	Oct.	10	1	3	12.58	10.56	4	22.35	43.85	35.26	9.62
Anagyris foetida	5	Nov.	11	1	1	0	0	0	0	0	0	0
Anagyris foetida	5	Nov.	11	1	2	0	0	0	0	0	0	0
Anagyris foetida	5	Nov.	11	1	3	0	0	0	0	0	0	0
Anagyris foetida	5	Dec.	12	1	1	0	0	0	0	0	0	0
Anagyris foetida	5	Dec.	12	1	2	0	0	0	0	0	0	0
Anagyris foetida	5	Dec.	12	1	3	0	0	0	0	0	0	0
Anagyris foetida	5	Jan.	1	1	1	0	0	0	0	0	0	0
Anagyris foetida	5	Jan.	1	1	2	0	0	0	0	0	0	0
Anagyris foetida	5	Jan.	1	1	3	0	0	0	0	0	0	0
Anagyris foetida	5	Feb.	2	1	1	0	0	0	0	0	0	0
Anagyris foetida	5	Feb.	2	1	2	0	0	0	0	0	0	0
Anagyris foetida	5	Feb.	2	1	3	0	0	0	0	0	0	0
Anagyris foetida	5	Mar.	3	2	1	16.85	10.78	5.26	13.09	37.25	28.61	8.85
Anagyris foetida	5	Mar.	3	1	2	16.1	6.58	5.12	14.16	38.72	25.25	8.22
Anagyris foetida	5	Mar	3	1	3	16.24	8.36	5.13	13.25	37.96	26.52	6.52
Anagyris foetida	5	Apr.	4	2	1	19.52	12.94	4.96	13.7	38.65	31.26	6.68
Anagyris foetida	5	Apr.	4	2	2	18.2	10.23	4.83	14.35	38.63	28.63	6.99
Anagyris foetida	5	Apr.	4	2	3	18.65	11.65	5.1	13.69	38.52	29.65	8.52
Anagyris foetida	5	May	5	2	1	21.21	11.36	4.65	14.68	39.52	33.58	7.68
Anagyris foetida	5	May	5	2	2	19.36	11.2	4.25	14.25	40.25	28.32	7.92
Anagyris foetida	5	May	5	2	3	20.32	11.23	4.41	14.36	39.62	30.24	7.56
Anagyris foetida	5	June	6	2	1	18.63	12.34	4.35	16.52	41.23	34.58	8.95
Anagyris foetida	5	June	6	2	2	20.14	11.36	4.36	15.35	42.65	29.35	8.36
Anagyris foetida	5	June	6	2	3	19.36	12.35	4.42	15.65	41.58	32.24	8.56
Anagyris foetida	5	July	7	2	1	16.23	11.34	4.25	17.35	42.57	35.1	9.15
Anagyris foetida	5	July	7	2	2	16.52	12.3	4.1	16.23	43.69	31.24	8.1
Anagyris foetida	5	July	7	2	3	16.25	11.35	4.15	16.54	42.62	33.69	9.56
Anagyris foetida	5	Aug.	8	2	1	15.3	12.54	4.14	18.54	43.2	35.12	10.24
Anagyris foetida	5	Aug.	8	2	2	14.12	12.14	3.9	17.54	44.2	33.2	8.36
Anagyris foetida	5	Aug.	8	2	3	14.36	12.45	4.2	17.52	43.2	34.52	95.54
Anagyris foetida	5	Sep.	9	2	1	12.58	12.38	3.92	20.39	43.57	34.27	9.63
Anagyris foetida	5	Sep.	9	2	2	14.2	11.3	4.13	19.36	44.32	34.52	8.45
Anagyris foetida	5	Sep.	9	2	3	13.24	11.85	4.1	16.85	43.65	34.59	8.96
Anagyris foetida	5	Oct.	10	2	1	12.1	11.35	4.14	22.41	43.21	34.56	10.23
Anagyris foetida	5	Oct.	10	2	2	13.2	10.25	4.09	22.36	44.32	34.2	9.62
Anagyris foetida	5	Oct.	10	2	3	12.54	11.45	4.12	22.25	43.69	34.57	9.62
Anagyris foetida	5	Nov.	11	2	1	0	0	0	0	0	0	0
Anagyris foetida	5	Nov.	11	2	2	0	0	0	0	0	0	0
Anagyris foetida	5	Nov.	11	2	3	0	0	0	0	0	0	0
Anagyris foetida	5	Dec.	12	2	1	0	0	0	0	0	0	0
Anagyris foetida	5	Dec.	12	2	2	0	0	0	0	0	0	0
Anagyris foetida	5	Dec.	12	2	3	0	0	0	0	0	0	0
Anagyris foetida	5	Jan.	1	2	1	0	0	0	0	0	0	0
Anagyris foetida	5	Jan.	1	2	2	0	0	0	0	0	0	0
Anagyris foetida	5	Jan.	1	2	3	0	0	0	0	0	0	0
Anagyris foetida	5	Feb.	2	2	1	0	0	0	0	0	0	0
Anagyris foetida	5	Feb.	2	2	2	0	0	0	0	0	0	0
Anagyris foetida	5	Feb.	2	2	3	0	0	0	0	0	0	0
Quercus infectoria	6	Mar.	3	1	1	22.63	5.19	7.24	27.62	40.32	28.6	10.93
Quercus infectoria	6	Mar.	3	1	2	17.15	6.03	8.7	27.25	41.35	30.95	10.04
Quercus infectoria	6	Mar	3	1	3	19.23	5.85	7.85	26.52	40.58	29.56	9.65
Quercus infectoria	6	Apr.	4	1	1	19.51	5.4	4.28	25.24	41.25	30.95	11.79
Quercus infectoria	6	Apr.	4	1	2	15.95	4.3	6.3	29.35	42.89	31.24	12.35
Quercus infectoria	6	Apr.	4	1	3	16.25	4.68	5.62	27.45	41.23	30.25	11.23
Quercus infectoria	6	May	5	1	1	15.63	5.51	4.42	35.21	43.25	35.6	12.76
Quercus infectoria	6	May	5	1	2	13.24	5.7	4.51	34.43	44.65	33.41	13.65
Quercus infectoria	6	May	5	1	3	14.32	5.6	4.25	34.52	43.58	34.51	12.36
Quercus infectoria	6	June	6	1	1	13.24	5.68	5.62	36.5	45.63	36.14	13.56
Quercus infectoria	6	June	6	1	2	11.25	5.63	5.12	35.52	46.58	34.58	15.36
Quercus infectoria	6	June	6	1	3	12.36	5.62	5.23	35.58	45.5	35.69	14.25
Quercus infectoria	6	July	7	1	1	10.01	5.98	6.13	26.63	47.35	37.45	15.07
Quercus infectoria	6	July	7	1	2	10.54	6.1	5.36	31.2	48.71	35.87	15.48
Quercus infectoria	6	July	7	1	3	10.24	6.01	5.86	29.58	47.36	36.54	14.56
Quercus infectoria	6	Aug.	8	1	1	9.58	6.24	5.32	25.3	48.2	35.21	16.54
Quercus infectoria	6	Aug.	8	1	2	9.57	6.45	6.45	28.53	49.38	35.89	16.57
Quercus infectoria	6	Aug.	8	1	3	9.55	6.31	5.69	27.52	48.35	35.52	15.69
Quercus infectoria	6	Sep.	9	1	1	8.68	7.15	5.96	22.15	46.87	35.69	17.45
Quercus infectoria	6	Sep.	9	1	2	8.76	6.88	8.62	26.92	47.36	39.65	17.34
Quercus infectoria	6	Sep.	9	1	3	8.65	7.1	6.98	24.56	46.54	37.48	16.58
Quercus infectoria	6	Oct.	10	1	1	8.73	7.52	6.1	26.62	45.36	35.62	16.59
Quercus infectoria	6	Oct.	10	1	2	8.63	8.06	7.54	26.5	46.59	38.54	16.52
Quercus infectoria	6	Oct.	10	1	3	8.69	7.96	6.58	25.25	45.2	37.89	16.54
Quercus infectoria	6	Nov.	11	1	1	9.33	7.35	6.52	26.35	44.85	34.58	15.23
Quercus infectoria	6	Nov.	11	1	2	7.07	8.65	7.25	26.95	45.89	37.69	15.36
Quercus infectoria	6	Nov.	11	1	3	8.25	7.86	6.69	26.58	44.52	36.52	15.2
Quercus infectoria	6	Dec.	12	1	1	11.32	7.13	7.12	27.25	44.95	34.96	14.2
Quercus infectoria	6	Dec.	12	1	2	10.24	7.5	7.26	25.38	44.2	36.69	13.25
Quercus infectoria	6	Dec.	12	1	3	9.1	7.35	7.16	26.54	44.2	35.21	13.59
Quercus infectoria	6	Jan.	1	1	1	13.52	6.52	7.36	26.59	43.52	33.25	13.69
Quercus infectoria	6	Jan.	1	1	2	13.47	7.25	7.35	26.54	44.35	35.54	11.24
Quercus infectoria	6	Jan.	1	1	3	13.49	7.4	7.23	26.98	43.58	34.26	12.52
Quercus infectoria	6	Feb.	2	1	1	15.28	6.58	7.89	27.13	42.57	32.1	11.24
Quercus infectoria	6	Feb.	2	1	2	15.47	6.21	7.14	25.1	43.85	34.29	12.39
Quercus infectoria	6	Feb.	2	1	3	15.36	6.4	7.52	26.57	42.69	33.69	11.35
Quercus infectoria	6	Mar.	3	2	1	17.15	6.03	8.7	27.25	41.35	30.95	10.04
Quercus infectoria	6	Mar.	3	1	2	22.63	5.6	7.24	27.62	40.32	28.6	10.93
Quercus infectoria	6	Mar	3	1	3	19.52	5.86	7.85	27.54	40.58	29.52	10.32
Quercus infectoria	6	Apr.	4	2	1	15.95	4.3	6.3	29.35	42.89	31.24	12.35
Quercus infectoria	6	Apr.	4	2	2	19.51	5.4	4.28	25.24	41.25	30.95	11.79
Quercus infectoria	6	Apr.	4	2	3	17.25	4.65	5.36	27.41	41.87	30.24	11.36
Quercus infectoria	6	May	5	2	1	13.24	5.7	4.51	34.43	44.65	33.41	13.65
Quercus infectoria	6	May	5	2	2	15.63	5.51	4.42	35.21	43.25	35.6	12.76
Quercus infectoria	6	May	5	2	3	14.25	5.6	4.5	35.25	43.68	34.78	12.69
Quercus infectoria	6	June	6	2	1	11.25	5.63	5.12	35.52	46.58	34.58	15.36
Quercus infectoria	6	June	6	2	2	13.24	5.68	5.62	36.5	45.63	36.14	13.56
Quercus infectoria	6	June	6	2	3	12.65	5.62	5.25	35.85	45.85	35.21	14.58
Quercus infectoria	6	July	7	2	1	10.54	6.1	5.36	31.2	48.71	35.87	15.48
Quercus infectoria	6	July	7	2	2	10.01	5.98	6.13	26.63	47.35	37.45	15.07
Quercus infectoria	6	July	7	2	3	10.25	6.01	5.86	28.54	47.65	36.25	15.3
Quercus infectoria	6	Aug.	8	2	1	9.57	6.45	6.45	28.53	49.38	35.89	16.57
Quercus infectoria	6	Aug.	8	2	2	9.58	6.24	5.32	25.3	48.2	35.21	16.54
Quercus infectoria	6	Aug.	8	2	3	9.55	6.3	5.78	26.58	48.63	35.21	16.2
Quercus infectoria	6	Sep.	9	2	1	8.76	6.88	8.62	26.92	47.36	39.65	17.34
Quercus infectoria	6	Sep.	9	2	2	8.68	7.15	5.96	22.15	46.87	35.69	17.45
Quercus infectoria	6	Sep.	9	2	3	8.7	7.01	6.58	24.58	46.57	37.54	16.58
Quercus infectoria	6	Oct.	10	2	1	8.63	8.06	7.54	26.5	46.59	38.54	16.52
Quercus infectoria	6	Oct.	10	2	2	8.73	7.52	6.1	26.62	45.36	35.62	16.59
Quercus infectoria	6	Oct.	10	2	3	8.72	7.59	6.84	26.51	45.82	36.52	16.53
Quercus infectoria	6	Nov.	11	2	1	7.07	8.65	7.25	26.95	45.89	37.69	15.36
Quercus infectoria	6	Nov.	11	2	2	9.33	7.35	6.52	26.35	44.85	34.58	15.23
Quercus infectoria	6	Nov.	11	2	3	8.1	7.96	6.59	26.58	44.51	36.52	15.24
Quercus infectoria	6	Dec.	12	2	1	10.24	7.5	7.26	25.38	44.2	36.69	13.25
Quercus infectoria	6	Dec.	12	2	2	11.32	7.13	7.12	27.25	44.95	34.96	14.2
Quercus infectoria	6	Dec.	12	2	3	10.65	4.36	7.2	26.57	44.36	35.41	13.69
Quercus infectoria	6	Jan.	1	2	1	13.47	7.25	7.35	26.54	44.35	35.54	11.24
Quercus infectoria	6	Jan.	1	2	2	13.52	6.52	7.36	26.59	43.52	33.25	13.69
Quercus infectoria	6	Jan.	1	2	3	13.49	6.86	7.24	26.52	43.58	34.14	12.25
Quercus infectoria	6	Feb.	2	2	1	15.47	6.21	7.14	25.1	43.85	34.29	12.39
Quercus infectoria	6	Feb.	2	2	2	15.28	6.58	7.89	27.13	42.57	32.1	11.24
Quercus infectoria	6	Feb.	2	2	3	15.36	6.32	7.54	26.47	42.95	33.57	11.24
Quercus coccifera	7	Mar.	3	1	1	8.3	5.6	6.3	28.6	51.3	45.1	17.6
Quercus coccifera	7	Mar.	3	1	2	8.4	5.8	6.9	27.8	58.26	47.65	18.62
Quercus coccifera	7	Mar	3	1	3	8.35	5.7	6.65	27.56	53.25	46.32	17.52
Quercus coccifera	7	Apr.	4	1	1	12.6	5.7	6.2	32.5	53.2	44.36	16.52
Quercus coccifera	7	Apr.	4	1	2	13.2	5.8	6.3	31.2	55.36	45.28	17.54
Quercus coccifera	7	Apr.	4	1	3	12.92	5.75	6.25	30.25	52.36	44.58	16.59
Quercus coccifera	7	May	5	1	1	9.6	5.2	6.1	35.4	54.6	43.25	15.58
Quercus coccifera	7	May	5	1	2	10.3	5.3	6.23	34.65	55.26	44.58	16.36
Quercus coccifera	7	May	5	1	3	10.2	5.25	6.15	34.59	54.65	44.63	15.89
Quercus coccifera	7	June	6	1	1	7.6	4.3	5.9	38.3	55.68	43.85	15.85
Quercus coccifera	7	June	6	1	2	8.3	4.4	5.96	37.85	54.36	43.74	16.21
Quercus coccifera	7	June	6	1	3	7.92	4.35	5.95	37.52	55.24	43.25	16.58
Quercus coccifera	7	July	7	1	1	6.3	3.8	5.6	39.1	56.28	42.65	14.52
Quercus coccifera	7	July	7	1	2	6.5	3.75	5.85	38.62	55.36	43.95	15.28
Quercus coccifera	7	July	7	1	3	6.4	3.76	5.7	38.56	55.69	43.21	15.02
Quercus coccifera	7	Aug.	8	1	1	6.9	4.6	5.5	39.6	55.84	43.65	15.69
Quercus coccifera	7	Aug.	8	1	2	7.1	3.95	5.63	39.52	54.36	42.85	16.25
Quercus coccifera	7	Aug.	8	1	3	6.96	4.25	5.55	39.52	55.98	42.58	15.67
Quercus coccifera	7	Sep.	9	1	1	6.3	4.3	5.6	34.5	56.36	42.65	16.52
Quercus coccifera	7	Sep.	9	1	2	6.1	4.2	5.7	35.52	56.32	42.58	15.85
Quercus coccifera	7	Sep.	9	1	3	6.2	4.25	5.65	35.1	56.35	42.58	15.69
Quercus coccifera	7	Oct.	10	1	1	6.4	4.9	5.9	31.2	58.32	44.58	16.2
Quercus coccifera	7	Oct.	10	1	2	5.9	4.85	5.98	32.25	57.58	43.57	17.25
Quercus coccifera	7	Oct.	10	1	3	6.12	4.88	5.84	31.59	57.45	43.65	16.98
Quercus coccifera	7	Nov.	11	1	1	7.2	4.5	6.5	29.6	59.84	44.56	17.58
Quercus coccifera	7	Nov.	11	1	2	6.8	4.96	6.62	28.63	58.26	44.2	18.23
Quercus coccifera	7	Nov.	11	1	3	6.95	4.76	6.35	28.95	58.63	44.21	17.69
Quercus coccifera	7	Dec.	12	1	1	7.6	3.5	6.9	28.5	60.25	45.87	18.96
Quercus coccifera	7	Dec.	12	1	2	7.4	3.8	7.1	27.65	59.62	45.82	18.95
Quercus coccifera	7	Dec.	12	1	3	7.5	3.66	7.01	28.14	59.62	45.32	18.2
Quercus coccifera	7	Jan.	1	1	1	7.6	3.6	7.1	27.5	61.23	47.58	19.52
Quercus coccifera	7	Jan.	1	1	2	7.6	4.1	7.13	26.52	60.25	46.95	19.5
Quercus coccifera	7	Jan.	1	1	3	7.52	3.85	7.01	27.52	58.62	46.52	19.02
Quercus coccifera	7	Feb.	2	1	1	6.4	4.8	7.2	26.3	60.52	49.85	19.75
Quercus coccifera	7	Feb.	2	1	2	7.9	5.1	7.25	25.36	59.26	48.57	19.87
Quercus coccifera	7	Feb.	2	1	3	6.58	5.01	7.15	26.5	56.32	47.52	19.32
Quercus coccifera	7	Mar.	3	2	1	8.4	5.8	6.9	27.8	58.26	47.65	18.62
Quercus coccifera	7	Mar.	3	1	2	8.3	5.6	6.3	28.6	51.3	45.1	17.6
Quercus coccifera	7	Mar	3	1	3	8.35	5.7	9.54	28.45	54.2	46.52	17.86
Quercus coccifera	7	Apr.	4	2	1	13.2	5.8	6.3	31.2	55.36	45.28	17.54
Quercus coccifera	7	Apr.	4	2	2	12.6	5.7	6.2	32.5	53.2	44.36	16.52
Quercus coccifera	7	Apr.	4	2	3	12.86	5.75	6.25	32.29	52.36	44.36	16.89
Quercus coccifera	7	May	5	2	1	10.3	5.3	6.23	34.65	55.26	44.58	16.36
Quercus coccifera	7	May	5	2	2	9.6	5.2	6.1	35.4	54.6	43.25	15.58
Quercus coccifera	7	May	5	2	3	9.95	5.25	6.15	35.6	53.26	43.25	15.86
Quercus coccifera	7	June	6	2	1	8.3	4.4	5.96	37.85	54.36	43.74	16.21
Quercus coccifera	7	June	6	2	2	7.6	4.3	5.9	38.3	55.68	43.85	15.85
Quercus coccifera	7	June	6	2	3	7.85	4.35	5.85	38.45	54.45	43.25	15.62
Quercus coccifera	7	July	7	2	1	6.5	3.75	5.85	38.62	55.36	43.95	15.28
Quercus coccifera	7	July	7	2	2	6.3	3.8	5.6	39.1	56.28	42.65	14.52
Quercus coccifera	7	July	7	2	3	6.4	3.76	5.7	39.52	55.32	42.65	15.24
Quercus coccifera	7	Aug.	8	2	1	7.1	3.95	5.63	39.52	54.36	42.85	16.25
Quercus coccifera	7	Aug.	8	2	2	6.9	4.6	5.5	39.6	55.84	43.65	15.69
Quercus coccifera	7	Aug.	8	2	3	7.01	4.32	5.55	39.52	56.32	42.57	15.32
Quercus coccifera	7	Sep.	9	2	1	6.1	4.2	5.7	35.52	56.32	42.58	15.85
Quercus coccifera	7	Sep.	9	2	2	6.3	4.3	5.6	34.5	56.36	42.65	16.52
Quercus coccifera	7	Sep.	9	2	3	6.2	4.25	5.65	35.14	56.24	42.5	15.23
Quercus coccifera	7	Oct.	10	2	1	5.9	4.85	5.98	32.25	57.58	43.57	17.25
Quercus coccifera	7	Oct.	10	2	2	6.4	4.9	5.9	31.2	58.32	44.58	16.2
Quercus coccifera	7	Oct.	10	2	3	6.12	4.81	5.87	32.65	57.24	43.1	16.54
Quercus coccifera	7	Nov.	11	2	1	6.8	4.96	6.62	28.63	58.26	44.2	18.23
Quercus coccifera	7	Nov.	11	2	2	7.2	4.5	6.5	29.6	59.84	44.56	17.58
Quercus coccifera	7	Nov.	11	2	3	6.93	4.8	6.55	29.54	58.41	44.21	17.54
Quercus coccifera	7	Dec.	12	2	1	7.4	3.8	7.1	27.65	59.62	45.82	18.95
Quercus coccifera	7	Dec.	12	2	2	7.6	3.5	6.9	28.5	60.25	45.87	18.96
Quercus coccifera	7	Dec.	12	2	3	7.5	3.6	7.02	26.54	59.62	45.21	18.24
Quercus coccifera	7	Jan.	1	2	1	7.6	4.1	7.13	26.52	60.25	46.95	19.5
Quercus coccifera	7	Jan.	1	2	2	7.6	3.6	7.1	27.5	61.23	47.58	19.52
Quercus coccifera	7	Jan.	1	2	3	7.23	3.86	7.05	27.54	56.21	46.28	19.21
Quercus coccifera	7	Feb.	2	2	1	7.9	5.1	7.25	25.36	59.26	48.57	19.87
Quercus coccifera	7	Feb.	2	2	2	6.4	4.8	7.2	26.3	60.52	49.85	19.75
Quercus coccifera	7	Feb.	2	2	3	6.85	4.95	7.25	26.52	54.26	48.62	19.32

## Sheet: Hay Yield
Rangeland	Month	Month	Year	Replication	Fresh Hay Yield	Dry Hay Yield	Dry Matter Ratio
Protected pasture area	Mar.	3	1	1	630.7	226.332	35.9145
Protected pasture area	Mar.	3	1	2	599.3	247.61	38.1596
Protected pasture area	Mar.	3	1	3	602.78	244.386	41.9108
Protected pasture area	Mar	3	1	4	666	251.906	41.652
Protected pasture area	Mar	3	1	5	597.4	288.968	41.8634
Protected pasture area	Mar	3	1	6	613	250.342	40.8881
Protected pasture area	Apr.	4	1	1	884	150	17.0382
Protected pasture area	Apr.	4	1	2	1124	207	18.2583
Protected pasture area	Apr.	4	1	3	1112	233	22.0845
Protected pasture area	Apr.	4	1	4	1029	222	21.8032
Protected pasture area	Apr.	4	1	5	1087	203	18.8482
Protected pasture area	Apr.	4	1	6	1269	167	14.1361
Protected pasture area	May	5	1	1	153	116.7	78.1658
Protected pasture area	May	5	1	2	191	130.5	68.6989
Protected pasture area	May	5	1	3	348	187.92	55.5315
Protected pasture area	May	5	1	4	250	175.98	73.5795
Protected pasture area	May	5	1	5	725	204.12	28.4359
Protected pasture area	May	5	1	6	275	169.58	63.9705
Protected pasture area	June	6	1	1	141.64	122.44	86.5968
Protected pasture area	June	6	1	2	163.42	117.08	73.9901
Protected pasture area	June	6	1	3	285.8	194.56	69.0882
Protected pasture area	June	6	1	4	250.76	197.26	79.7835
Protected pasture area	June	6	1	5	228.66	188.66	83.3183
Protected pasture area	June	6	1	6	200.14	162.7	80.9699
Protected pasture area	July	7	1	1	155.56	136.16	87.3538
Protected pasture area	July	7	1	2	199.32	160.68	80.8765
Protected pasture area	July	7	1	3	238.7	159.84	72.2676
Protected pasture area	July	7	1	4	207.04	180.86	87.2624
Protected pasture area	July	7	1	5	244.44	139.52	58.2736
Protected pasture area	July	7	1	6	221.2	147.4	68.0951
Protected pasture area	Aug.	8	1	1	130.98	117.96	90.0723
Protected pasture area	Aug.	8	1	2	200.86	170.64	86.1771
Protected pasture area	Aug.	8	1	3	215.68	162.06	80.1863
Protected pasture area	Aug.	8	1	4	195.96	184.88	94.3494
Protected pasture area	Aug.	8	1	5	199.48	169.56	86.6309
Protected pasture area	Aug.	8	1	6	194.92	177.34	91.5218
Protected pasture area	Sep.	9	1	1	126.64	107.3	85.3766
Protected pasture area	Sep.	9	1	2	182.36	157.78	88.1641
Protected pasture area	Sep.	9	1	3	172.62	146.94	86.6862
Protected pasture area	Sep.	9	1	4	197.4	183.76	93.1033
Protected pasture area	Sep.	9	1	5	158.44	143.5	90.7675
Protected pasture area	Sep.	9	1	6	184.68	167.22	91.1045
Protected pasture area	Oct.	10	1	1	106.194	92.318	87.4565
Protected pasture area	Oct.	10	1	2	153.67	110.24	72.5211
Protected pasture area	Oct.	10	1	3	97.354	74.42	76.5084
Protected pasture area	Oct.	10	1	4	93.258	60.92	65.5664
Protected pasture area	Oct.	10	1	5	197.18	141.86	72.2671
Protected pasture area	Oct.	10	1	6	135.225	107.86	79.9321
Protected pasture area	Nov.	11	1	1	95	76	80.771
Protected pasture area	Nov.	11	1	2	218	132	78.1513
Protected pasture area	Nov.	11	1	3	106	72	71.6485
Protected pasture area	Nov.	11	1	4	282	165	68.2801
Protected pasture area	Nov.	11	1	5	271	168	65.486
Protected pasture area	Nov.	11	1	6	143	103	61.9692
Protected pasture area	Dec.	12	1	1	114.69	83.7	73.1747
Protected pasture area	Dec.	12	1	2	273	153	71.2539
Protected pasture area	Dec.	12	1	3	145.798	94	65.2204
Protected pasture area	Dec.	12	1	4	459	272	62.7284
Protected pasture area	Dec.	12	1	5	338	194	61.2713
Protected pasture area	Dec.	12	1	6	189	126	57.6751
Protected pasture area	Jan.	1	1	1	409.8	138.213	33.8396
Protected pasture area	Jan.	1	1	2	397.2	161.187	40.0279
Protected pasture area	Jan.	1	1	3	348	169.877	38.7279
Protected pasture area	Jan.	1	1	4	345.2	150.4	38.4422
Protected pasture area	Jan.	1	1	5	463.6	190.806	43.9602
Protected pasture area	Jan.	1	1	6	384.8	183.097	42.8187
Protected pasture area	Feb.	2	1	1	487	173.048	37.3536
Protected pasture area	Feb.	2	1	2	378	157.568	40.4889
Protected pasture area	Feb.	2	1	3	420	220.284	40.8217
Protected pasture area	Feb.	2	1	4	493.4	205.361	39.2439
Protected pasture area	Feb.	2	1	5	409	207.942	39.5761
Protected pasture area	Feb.	2	1	6	452.8	227.887	42.8804
Protected pasture area	Mar.	3	1	1	618.4	214.032	34.6318
Protected pasture area	Mar.	3	1	2	597	245.31	37.1477
Protected pasture area	Mar.	3	1	3	599	240.606	41.1369
Protected pasture area	Mar.	3	1	4	660	245.906	41.0758
Protected pasture area	Mar.	3	1	5	593	284.568	41.4636
Protected pasture area	Mar.	3	1	6	609	246.342	40.6532
Protected pasture area	Apr.	4	2	1	903	331.058	36.5202
Protected pasture area	Apr.	4	2	2	863	352.297	35.3532
Protected pasture area	Apr.	4	2	3	790	343.368	37.9059
Protected pasture area	Apr.	4	2	4	921.6	349.742	37.832
Protected pasture area	Apr.	4	2	5	922	337.839	35.7203
Protected pasture area	Apr.	4	2	6	999.6	324.561	43.3261
Protected pasture area	May	5	2	1	427	278.4	65.5783
Protected pasture area	May	5	2	2	487	272.726	60.3668
Protected pasture area	May	5	2	3	352.2	218.29	59.0747
Protected pasture area	May	5	2	4	331	164.161	54.7675
Protected pasture area	May	5	2	5	398	216.865	57.1056
Protected pasture area	May	5	2	6	388	229.368	57.6177
Protected pasture area	June	6	2	1	157.8	112.542	71.8663
Protected pasture area	June	6	2	2	221.4	150.477	66.2984
Protected pasture area	June	6	2	3	275.6	125.645	59.2164
Protected pasture area	June	6	2	4	262	175.535	61.903
Protected pasture area	June	6	2	5	235.6	151.903	67.165
Protected pasture area	June	6	2	6	207.672	156.555	68.0604
Protected pasture area	July	7	2	1	155	109.123	70.9187
Protected pasture area	July	7	2	2	196.4	151.697	72.4477
Protected pasture area	July	7	2	3	240.8	138.187	74.8661
Protected pasture area	July	7	2	4	225.4	150.981	76.3891
Protected pasture area	July	7	2	5	212.6	116.181	79.2799
Protected pasture area	July	7	2	6	189.6	99.6774	77.6046
Protected pasture area	Aug.	8	2	1	143.2	112.4	78.2966
Protected pasture area	Aug.	8	2	2	178	132.206	77.4303
Protected pasture area	Aug.	8	2	3	204.4	114.768	80.7983
Protected pasture area	Aug.	8	2	4	203	114.258	84.3485
Protected pasture area	Aug.	8	2	5	223.8	90.871	81.7786
Protected pasture area	Aug.	8	2	6	220	91.7581	74.9396
Protected pasture area	Sep.	9	2	1	199	166.526	83.8366
Protected pasture area	Sep.	9	2	2	180	119.952	80.9934
Protected pasture area	Sep.	9	2	3	272	186.919	78.7822
Protected pasture area	Sep.	9	2	4	237	173.019	77.2108
Protected pasture area	Sep.	9	2	5	140	106.21	76.0379
Protected pasture area	Sep.	9	2	6	191	151.394	68.7874
Protected pasture area	Oct.	10	2	1	253	165.416	66.4004
Protected pasture area	Oct.	10	2	2	258.2	189.926	67.7305
Protected pasture area	Oct.	10	2	3	309	174.045	65.9463
Protected pasture area	Oct.	10	2	4	279	135.194	66.1001
Protected pasture area	Oct.	10	2	5	222	144.277	66.0527
Protected pasture area	Oct.	10	2	6	326	218.229	73.8009
Protected pasture area	Nov.	11	2	1	278.86	169.987	65.141
Protected pasture area	Nov.	11	2	2	294.32	175.065	64.9234
Protected pasture area	Nov.	11	2	3	301.84	169.516	56.7859
Protected pasture area	Nov.	11	2	4	294.32	169.355	58.0081
Protected pasture area	Nov.	11	2	5	381.9	209.032	60.0345
Protected pasture area	Nov.	11	2	6	218.98	140.981	60.1321
Protected pasture area	Dec.	12	2	1	203.2	123.484	66.2685
Protected pasture area	Dec.	12	2	2	537.04	213.387	62.4104
Protected pasture area	Dec.	12	2	3	383.44	202.503	54.6365
Protected pasture area	Dec.	12	2	4	176.86	90.6516	54.8606
Protected pasture area	Dec.	12	2	5	436.4	230.277	55.0477
Protected pasture area	Dec.	12	2	6	407.36	194.677	43.4744
Protected pasture area	Jan.	1	2	1	419.8	148.213	35.4224
Protected pasture area	Jan.	1	2	2	404.2	168.187	41.5226
Protected pasture area	Jan.	1	2	3	353	174.877	40.2543
Protected pasture area	Jan.	1	2	4	352.2	157.4	39.8275
Protected pasture area	Jan.	1	2	5	471.6	198.806	45.1056
Protected pasture area	Jan.	1	2	6	392.8	191.097	43.7918
Protected pasture area	Feb.	2	2	1	495.3	181.348	38.3953
Protected pasture area	Feb.	2	2	2	385.5	165.068	41.5901
Protected pasture area	Feb.	2	2	3	426.82	227.104	41.9105
Protected pasture area	Feb.	2	2	4	498.3	210.261	40.326
Protected pasture area	Feb.	2	2	5	413.9	212.842	40.6621
Protected pasture area	Feb.	2	2	6	457.7	232.787	44.0055
Protected pasture area	Mar.	3	2	1	630.7	226.332	35.9145
Protected pasture area	Mar.	3	2	2	599.3	247.61	38.1596
Protected pasture area	Mar.	3	2	3	602.78	244.386	41.9108
Protected pasture area	Mar.	3	2	4	666	251.906	41.652
Protected pasture area	Mar.	3	2	5	597.4	288.968	41.8634
Protected pasture area	Mar.	3	2	6	613	250.342	40.8881

## Sheet: Chemical Analysis of Hay
Rangeland	Month	Month	Year	Replication	Crude Protein	Crude Ash	Crude Fat	Crude Fiber	NDF	ADF	ADL
Grazing Pasture Area	Mar.	3	1	1	10.7247	14.4	4.92	24.87	44.337	32.1	10.23
Grazing Pasture Area	Mar.	3	1	2	11.2154	13.21	5.75049	21.56	40.4776	31.25	11.36
Grazing Pasture Area	Mar.	3	1	3	12.6749	14.25	4.55	25.8686	41.36	33.23	12.23
Grazing Pasture Area	Apr.	4	1	1	10.32	13.1	5.92	26.58	45	38.3865	11.23
Grazing Pasture Area	Apr.	4	1	2	10.36	12.1	5.96	22.779	42.32	32.7014	12.25
Grazing Pasture Area	Apr.	4	1	3	12.96	13.23	4.57231	27.5328	42.3647	35.26	13.25
Grazing Pasture Area	May	5	1	1	9.18398	10.32	6.34921	29.33	45.23	40.6944	14.2
Grazing Pasture Area	May	5	1	2	9.95	9.95	4.72122	29.65	55.4632	39.65	13.9411
Grazing Pasture Area	May	5	1	3	11.02	11.3	5.1	32.6347	49.3721	38.52	15.32
Grazing Pasture Area	June	6	1	1	8.89	9.65	4.09412	35.26	49.65	42.2	15.23
Grazing Pasture Area	June	6	1	2	8.05875	9.58	4.85981	34.21	59.8881	40.25	15.23
Grazing Pasture Area	June	6	1	3	9.98	10.36	5.25813	34.58	55.6	41.23	16.54
Grazing Pasture Area	July	7	1	1	8.52	9.32	4.34333	36.54	54.3062	43.2	17.6788
Grazing Pasture Area	July	7	1	2	7.5	9.12	5.19	38.6595	61.2569	41.23	16.35
Grazing Pasture Area	July	7	1	3	8.12	9.36	5.00894	35.69	58.2922	42.32	16.58
Grazing Pasture Area	Aug.	8	1	1	7.13	8.25	5.69844	37.6699	63.24	43.25	17.78
Grazing Pasture Area	Aug.	8	1	2	7.45	8.36	5.23	39.65	64.1702	43.25	17.36
Grazing Pasture Area	Aug.	8	1	3	8.0339	8.54	4.75059	38.74	63.7435	44.32	17.58
Grazing Pasture Area	Sep.	9	1	1	6.19484	8.69	5.05297	38.21	68.2	44.21	17.1
Grazing Pasture Area	Sep.	9	1	2	7.01922	7.65	4.91006	40.1434	65.5348	42.52	17.65
Grazing Pasture Area	Sep.	9	1	3	7.19719	7.89	5.52	40.6395	67.9294	45.21	18.63
Grazing Pasture Area	Oct.	10	1	1	9.96041	9.71126	5.72632	35.26	59.3348	43.25	15.2
Grazing Pasture Area	Oct.	10	1	2	8.41615	9.65	5.75264	36.54	63.7218	43.65	16.52
Grazing Pasture Area	Oct.	10	1	3	8.36082	10.9905	6.42202	39.65	66.32	44.32	18.36
Grazing Pasture Area	Nov.	11	1	1	10.21	10.23	4.44555	34.25	55.68	42.25	14.63
Grazing Pasture Area	Nov.	11	1	2	9.14	11.2	5.33	33.9965	59.383	41.25	14.9393
Grazing Pasture Area	Nov.	11	1	3	9.65	11.35	6.87214	38.112	56.3985	41.23	17.98
Grazing Pasture Area	Dec.	12	1	1	11.4247	11.65	6.07143	33.8873	53.21	42.56	13.2
Grazing Pasture Area	Dec.	12	1	2	11.25	12.3	6.52985	33.25	52.36	40.25	14.2
Grazing Pasture Area	Dec.	12	1	3	11.32	11.54	7.1	35.41	54.23	40.9136	17.3982
Grazing Pasture Area	Jan.	1	1	1	11.23	14.26	6.36583	27.1274	52.12	41.25	12.25
Grazing Pasture Area	Jan.	1	1	2	11.3456	13.6	6.93493	32.65	51.1	40.25	13.26
Grazing Pasture Area	Jan.	1	1	3	12.8323	13.65	7.2	32.5135	51.36	39.65	16.52
Grazing Pasture Area	Feb.	2	1	1	11.65	15.32	5.12	23.7512	51.8323	40.25	12.25
Grazing Pasture Area	Feb.	2	1	2	11.69	14.63	6.89964	32.343	50.6877	39.65	13.24
Grazing Pasture Area	Feb.	2	1	3	13.3491	14.32	5.23349	29.1028	50.7177	36.25	15.23
Grazing Pasture Area	Mar.	3	1	1	12.4767	16.35	5.22209	23.15	45.32	35.62	11.3
Grazing Pasture Area	Mar.	3	1	2	12.65	15.2	6.7234	22.68	43.4463	34.52	12.42
Grazing Pasture Area	Mar.	3	1	3	14.0322	14.65	6.87984	27.58	45.36	34.25	12.35
Grazing Pasture Area	Apr.	4	1	1	14.6137	15.2	6.83594	22.3312	46.23	37.65	12.36
Grazing Pasture Area	Apr.	4	1	2	13.7735	15.23	6.5625	22.4895	47.2781	36.58	14.32
Grazing Pasture Area	Apr.	4	1	3	14.3	15.3	6.82012	26.54	46.3	36.25	13.2
Grazing Pasture Area	May	5	1	1	11.7078	12.36	5.19481	32.3092	50.23	41.3	14.25
Grazing Pasture Area	May	5	1	2	10.3629	11.3	6.33714	25.62	62.1406	40.32	15.1
Grazing Pasture Area	May	5	1	3	10.32	13.26	4.971	24.15	58.63	39.65	15.36
Grazing Pasture Area	June	6	1	1	9.95	10.09	4.25685	33.65	53.4462	42.02	16.52
Grazing Pasture Area	June	6	1	2	9.98	10.36	4.80848	30.25	65.9836	41.25	15.23
Grazing Pasture Area	June	6	1	3	9.06347	11.35	5.35885	29.65	62.35	42.25	16.54
Grazing Pasture Area	July	7	1	1	8.85705	9.25	4.22671	34.4249	57.3885	42.35	18.23
Grazing Pasture Area	July	7	1	2	9.6129	9.56	4.91659	35.62	66.21	42.65	16.25
Grazing Pasture Area	July	7	1	3	8.57622	9.54	4.70383	34.8373	65.34	43.25	16.58
Grazing Pasture Area	Aug.	8	1	1	7.62	9.95	4.11919	39.5251	61.23	43.36	18.36
Grazing Pasture Area	Aug.	8	1	2	8.12688	8.52	4.63	39.65	66.3	44.25	18.32
Grazing Pasture Area	Aug.	8	1	3	7.25	8.36	4.68521	35.69	66.4118	45.36	17.1
Grazing Pasture Area	Sep.	9	1	1	6.62524	10.6312	5.22648	34.1953	60.632	43.25	18.34
Grazing Pasture Area	Sep.	9	1	2	6.01138	9.12	4.74806	30.8429	58.9172	43.25	16.25
Grazing Pasture Area	Sep.	9	1	3	6.59	8.88991	4.02961	36.9029	64.6175	46.32	17.58
Grazing Pasture Area	Oct.	10	1	1	8.85	10.1524	6.28518	35.24	61.5158	44.21	16.52
Grazing Pasture Area	Oct.	10	1	2	9.38621	9.35	5.6325	34.48	57.2	43.26	15.32
Grazing Pasture Area	Oct.	10	1	3	9.1	8.84	5.52	37.42	59.1456	45.23	16.2
Grazing Pasture Area	Nov.	11	1	1	10.12	10.32	4.65753	32.58	55.684	43.1	15.2
Grazing Pasture Area	Nov.	11	1	2	10.1599	9.65	4.05138	31.62	55.65	42.1	14.32
Grazing Pasture Area	Nov.	11	1	3	11.73	9.64	5.69	36.52	56.32	42.32	16.53
Grazing Pasture Area	Dec.	12	1	1	11.23	11.14	5.72391	30.26	51.6481	42.36	14.1
Grazing Pasture Area	Dec.	12	1	2	12.23	11.14	5.51559	29.54	51.27	41.25	14.12
Grazing Pasture Area	Dec.	12	1	3	11.96	10.54	5.89	31.24	50.4866	41.25	15.2
Grazing Pasture Area	Jan.	1	1	1	13.2	12.1	7.24763	29.4733	47.2896	40.25	13.25
Grazing Pasture Area	Jan.	1	1	2	13.1	13.25	6.37664	25.69	45.69	40.26	13.65
Grazing Pasture Area	Jan.	1	1	3	12.36	12.45	6.23	27.58	49.5609	38.52	15.32
Grazing Pasture Area	Feb.	2	1	1	14.36	13.23	6.99482	25.36	44.36	39.54	13.64
Grazing Pasture Area	Feb.	2	1	2	13.69	13.24	6.90909	22.45	44.36	38.52	13.24
Grazing Pasture Area	Feb.	2	1	3	13.58	13.8163	5.82609	24.56	48.9513	37.52	14.32
Grazing Pasture Area	Mar.	3	1	1	14.69	13.26	4.74138	23.54	40.2471	36.58	12.2
Grazing Pasture Area	Mar.	3	1	2	14.32	14.36	5.18784	21.65	43.25	34.2	13.1
Grazing Pasture Area	Mar.	3	1	3	14.3	14.35	5.22936	23.12	45.26	35.62	12.2
Protected Pasture Area	Mar.	3	2	1	13.4139	14.1382	6.87	21.17	44.32	30.25	10.25
Protected Pasture Area	Mar.	3	2	2	13.8131	15.24	7.4985	23.6921	44.3402	31.25	11.32
Protected Pasture Area	Mar.	3	2	3	14.7737	13.7075	7.7821	21.35	40	32.2	10.23
Protected Pasture Area	Apr.	4	2	1	12.36	12.65	6.40394	25.32	46.4797	35.62	11.26
Protected Pasture Area	Apr.	4	2	2	12.36	14.63	6.55582	27.5997	48.047	36.58	12.36
Protected Pasture Area	Apr.	4	2	3	13.11	12.69	6.88355	25.65	41.5037	38.8063	12.32
Protected Pasture Area	May	5	2	1	10.8442	12.54	5.36	32.988	56.1791	37.85	13.24
Protected Pasture Area	May	5	2	2	10.24	13.24	4.90681	32.14	55.36	40.23	14.36
Protected Pasture Area	May	5	2	3	11.1123	11.32	4.44915	32.2395	51.23	41.9336	14.32
Protected Pasture Area	June	6	2	1	9.25	11.85	5.23	35.24	59.62	39.65	14.26
Protected Pasture Area	June	6	2	2	8.54	12.89	4.26	35.26	66.8364	41.23	14.69
Protected Pasture Area	June	6	2	3	8.9	10.36	3.81356	35.8513	50.23	42.3	15.63
Protected Pasture Area	July	7	2	1	8.40573	11.3	5.1	36.3636	62.495	40.25	15.65
Protected Pasture Area	July	7	2	2	7.54	11.4	4.12	37.45	69.5415	41.36	15.68
Protected Pasture Area	July	7	2	3	7.96	9.96	3.7	36.8379	62.35	42.65	15.73
Protected Pasture Area	Aug.	8	2	1	8.25	10.4633	4.49074	38.54	68.1518	41.26	16.52
Protected Pasture Area	Aug.	8	2	2	6.98	10.5	4.16263	38.52	67.4865	42.35	16.5
Protected Pasture Area	Aug.	8	2	3	6.89	9.65	3.92823	39.0444	64.1415	43.2	16.12
Protected Pasture Area	Sep.	9	2	1	7.97519	8.95	3.73308	40.21	60.2871	42.65	16.58
Protected Pasture Area	Sep.	9	2	2	6.71	9.30684	3.77541	39.5587	66.6667	43.62	16.42
Protected Pasture Area	Sep.	9	2	3	6.03	9.23	4.07352	40.32	68.6278	43.58	16.32
Protected Pasture Area	Oct.	10	2	1	8.36	8.82	4.64891	37.54	57.5272	43.2	17.68
Protected Pasture Area	Oct.	10	2	2	7.5111	8.27372	4.3	35.9976	60.6031	44.2	17.1
Protected Pasture Area	Oct.	10	2	3	7.06948	9.65	5.81	38.54	59.4435	43.25	17.1
Protected Pasture Area	Nov.	11	2	1	8.47	9.65	6.00985	35.26	54.3183	43.6	18.62
Protected Pasture Area	Nov.	11	2	2	10.32	10.3558	5.13815	32.1	56.8385	43.26	17.32
Protected Pasture Area	Nov.	11	2	3	9.53581	9.82	6.15822	33.26	58.7716	42.2	17.25
Protected Pasture Area	Dec.	12	2	1	9.86011	10.54	6.84262	31.24	49.36	42.3	16.52
Protected Pasture Area	Dec.	12	2	2	11.36	11.45	5.46686	28.8488	53.06	42.1	17.1599
Protected Pasture Area	Dec.	12	2	3	10.32	11.15	6.2	28.1505	47.595	41.3	17.36
Protected Pasture Area	Jan.	1	2	1	11.25	11.84	7.02	29.5986	45.32	39.65	15.32
Protected Pasture Area	Jan.	1	2	2	12.1	12.52	7.59162	27.25	49.25	38.52	16.52
Protected Pasture Area	Jan.	1	2	3	11.25	11.15	7.45223	24.47	46.7958	38.52	16.2
Protected Pasture Area	Feb.	2	2	1	11.65	12.36	7.02	26.5437	44.32	37.52	13.24
Protected Pasture Area	Feb.	2	2	2	13.02	12.96	6.79542	26.58	48.0852	35.62	14.1
Protected Pasture Area	Feb.	2	2	3	12.45	12.36	6.32911	23.1	43.25	35.24	15.32
Protected Pasture Area	Mar.	3	2	1	12.6998	13.1	6.89	25.2682	43.15	33.2	10.5786
Protected Pasture Area	Mar.	3	2	2	13.1044	13.1	6.1	21.3	52.32	31.2	13.0046
Protected Pasture Area	Mar.	3	2	3	13.65	13.26	6.21	21.3	42.6338	32.2	13.2
Protected Pasture Area	Apr.	4	2	1	13.62	12.35	6.12	24.25	47.36	36.2	12.32
Protected Pasture Area	Apr.	4	2	2	13.2	13.68	6.42378	25.36	54.5925	35.26	13.1
Protected Pasture Area	Apr.	4	2	3	13.45	12.58	5.48173	30.5779	49.65	36.52	14.12
Protected Pasture Area	May	5	2	1	10.32	11.54	5.94059	28.56	56.35	36.52	14.25
Protected Pasture Area	May	5	2	2	11.3004	14.36	5.64726	29.65	60.32	39.52	14.36
Protected Pasture Area	May	5	2	3	10.36	12.78	5.17413	31.25	56.32	39.65	15.32
Protected Pasture Area	June	6	2	1	9.15	10.4488	5.04762	33.65	58.4935	38.52	15.1
Protected Pasture Area	June	6	2	2	10.56	13.2	5.89837	32.47	63.0359	40.23	15.1
Protected Pasture Area	June	6	2	3	9.35	12.24	5.86319	31.9992	61.23	42.3	16.36
Protected Pasture Area	July	7	2	1	7.27856	8.07366	5.01	35.1378	63.4857	39.65	16.12
Protected Pasture Area	July	7	2	2	10.0661	11.34	5.39084	35.4987	65.3	42.32	16.52
Protected Pasture Area	July	7	2	3	8.55295	10.2964	5.67164	34.45	67.1528	42.35	16.39
Protected Pasture Area	Aug.	8	2	1	6.52881	7.98348	4.26587	36.9069	67.1063	42.36	16.52
Protected Pasture Area	Aug.	8	2	2	8.65	9.96	4.2735	36.48	69.0821	43.25	16.62
Protected Pasture Area	Aug.	8	2	3	7.76881	9.39563	4.22414	36.6327	66.34	43.2	16.85
Protected Pasture Area	Sep.	9	2	1	6.28577	8.97653	4.35	35.6863	59.2717	43.25	17.32
Protected Pasture Area	Sep.	9	2	2	6.52	8.86209	4.21903	37.45	68.1448	44.21	16.78
Protected Pasture Area	Sep.	9	2	3	6.83047	9.95	4.21569	32.4698	64.23	43.1	17.1
Protected Pasture Area	Oct.	10	2	1	7.27798	9.96	4.59883	36.21	55.38	44.23	17.68
Protected Pasture Area	Oct.	10	2	2	7.1	8.85	5.21	38.21	62.35	44.3	17.02
Protected Pasture Area	Oct.	10	2	3	8.42854	10.36	5.22	37.58	63.7148	44.2	17.25
Protected Pasture Area	Nov.	11	2	1	9.29378	10.42	5.52632	33.21	49.2203	42.25	18.36
Protected Pasture Area	Nov.	11	2	2	8.15279	9.65	5.70136	34.25	58.2	44.3	17.63
Protected Pasture Area	Nov.	11	2	3	10.23	10.45	5.69	32.18	55.23	41.25	17.65
Protected Pasture Area	Dec.	12	2	1	11.36	12.36	5.96	30.26	46.58	41.3	17.32
Protected Pasture Area	Dec.	12	2	2	10.36	10.32	5.44337	28.8588	55.7593	41.2	16.32
Protected Pasture Area	Dec.	12	2	3	11.35	11.65	5.52	26.6614	54.32	40.26	16.35
Protected Pasture Area	Jan.	1	2	1	12.3	12.54	6.22	26.58	45.9096	40.36	14.25
Protected Pasture Area	Jan.	1	2	2	12.3043	12.45	5.26	24.56	51.5541	39.65	15.2
Protected Pasture Area	Jan.	1	2	3	12.7201	12.45	5.47297	24.36	51.24	37.52	15.24
Protected Pasture Area	Feb.	2	2	1	13.32	13.58	6.32184	23.14	44.35	38.52	12.13
Protected Pasture Area	Feb.	2	2	2	13.12	13.2278	5.35	21.3	47.1	34.52	14.32
Protected Pasture Area	Feb.	2	2	3	13.25	13.54	6.23	21.36	48.4223	34.5	14.1
Protected Pasture Area	Mar.	3	2	1	14.18	14.63	6.45	21.3	44.4621	34.2	11.35
Protected Pasture Area	Mar.	3	2	2	14.36	15.23	5.56	19.65	45.3	31.87	12.3
Protected Pasture Area	Mar.	3	2	3	14.26	14.95	6.58	18.54	43.21	31.1	12.2
